# Supplementary material for: Life Course Trajectories of Maternal Cardiovascular Risk Factors according to Offspring Birthweight: The HUNT Study
Source: PubMed Central journal article supplement (PMC7319986; doi:10.1038/s41598-020-66365-3), 2020-06-26

## **Supplementary material**

### **Life Course Trajectories of Maternal Cardiovascular Risk Factors according to Offspring Birthweight: The HUNT Study**

Julie Horn; Eirin B. Haug; Amanda R. Markovitz; Abigail Fraser; Lars J. Vatten; Pål R. Romundstad;  
Janet W. Rich-Edwards; Bjørn O. Åsvold

**Figure S1. Flow chart of study population.**

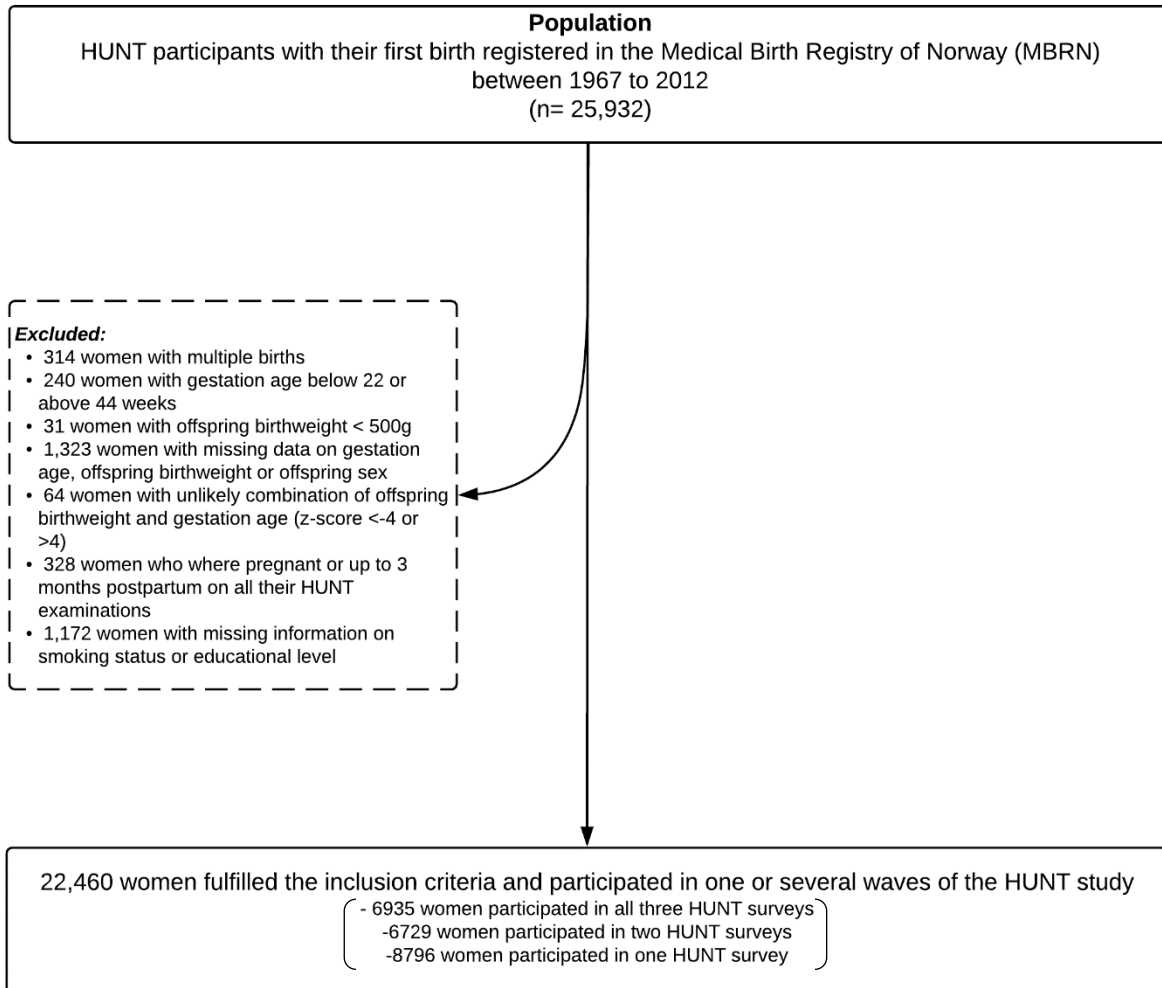

| <b>Table S1. Risk factor assessment by HUNT survey</b> |                                                                                                                                                                                |                                                                                                                                                                                                                                                                                              |                                                                                                                                                                                                                                                                                                                                                                                                                           |
|--------------------------------------------------------|--------------------------------------------------------------------------------------------------------------------------------------------------------------------------------|----------------------------------------------------------------------------------------------------------------------------------------------------------------------------------------------------------------------------------------------------------------------------------------------|---------------------------------------------------------------------------------------------------------------------------------------------------------------------------------------------------------------------------------------------------------------------------------------------------------------------------------------------------------------------------------------------------------------------------|
| <b>CVD risk factor</b>                                 | <b>HUNT1<br/>(1984-86)</b>                                                                                                                                                     | <b>HUNT2<br/>(1995-97)</b>                                                                                                                                                                                                                                                                   | <b>HUNT3<br/>(2006-08)</b>                                                                                                                                                                                                                                                                                                                                                                                                |
| Blood pressure                                         | Measured manually two times at 1-minute intervals using a sphygmomanometer after the person had come to rest<br>The current study used the mean value of these 2 measurements. | Measured three times at 1-minute intervals using an automatic oscillometric method (Dinamap, Critikon, Florida) after the person had come to rest, cuff size adjusted to arm circumference<br>The current study used the mean value of the 2 <sup>nd</sup> and 3 <sup>rd</sup> measurements. | Measured three times at 1-minute intervals using an automatic oscillometric method (Dinamap, Critikon, Florida) after the person had come to rest, cuff size adjusted to arm circumference<br>The current study used the mean value of the 2 <sup>nd</sup> and 3 <sup>rd</sup> measurements. The 2 <sup>nd</sup> measurement was used for women who lacked the 3 <sup>rd</sup> measurement due to sick leave among staff. |
| Resting heart rate                                     | Measured manually one time                                                                                                                                                     | See blood pressure measurement in HUNT2                                                                                                                                                                                                                                                      | See blood pressure measurement in HUNT3                                                                                                                                                                                                                                                                                                                                                                                   |
| Height and weight                                      | Measured with the person wearing light clothes and no shoes and were rounded to the nearest cm (height) and half kilo (weight)                                                 | Measured with the person wearing light clothes and no shoes and were rounded to the nearest cm (height) and half kilo (weight)                                                                                                                                                               | Measured with the person wearing light clothes and no shoes and were rounded to the nearest cm (height) and half kilo (weight)                                                                                                                                                                                                                                                                                            |
| Height and weight at age 18                            | -                                                                                                                                                                              | -                                                                                                                                                                                                                                                                                            | Self-reported                                                                                                                                                                                                                                                                                                                                                                                                             |
| Waist circumference                                    | -                                                                                                                                                                              | Measured to the nearest cm while the person was standing with arms hanging down at the height of the umbilicus                                                                                                                                                                               | Measured to the nearest cm while the person was standing with arms hanging down at the height of the umbilicus                                                                                                                                                                                                                                                                                                            |
| Hip circumference                                      | -                                                                                                                                                                              | Measured to the nearest cm while the person was standing with arms hanging down at the thickest part of the hip                                                                                                                                                                              | Measured to the nearest cm while the person was standing with arms hanging down at the thickest part of the hip                                                                                                                                                                                                                                                                                                           |
| Triglycerides                                          | -                                                                                                                                                                              | Analyzed in fresh non-fasting serum samples using enzymatic colorimetric methods (Boehring Mannheim, Germany)                                                                                                                                                                                | Analyzed in fresh non-fasting serum samples by a glycerol phosphate oxidase methodology, equipment from Abbott, Clinical Chemistry, USA                                                                                                                                                                                                                                                                                   |
| HDL cholesterol                                        | -                                                                                                                                                                              | Analyzed in fresh non-fasting serum samples using enzymatic                                                                                                                                                                                                                                  | Analyzed in fresh non-fasting serum samples with an accelerator                                                                                                                                                                                                                                                                                                                                                           |

|                          |  |                                                                                                                                                                                                                                                                                                                                                                                                                                                                                                                                      |                                                                                                                                                                                                              |                                                                                                                                   |
|--------------------------|--|--------------------------------------------------------------------------------------------------------------------------------------------------------------------------------------------------------------------------------------------------------------------------------------------------------------------------------------------------------------------------------------------------------------------------------------------------------------------------------------------------------------------------------------|--------------------------------------------------------------------------------------------------------------------------------------------------------------------------------------------------------------|-----------------------------------------------------------------------------------------------------------------------------------|
|                          |  |                                                                                                                                                                                                                                                                                                                                                                                                                                                                                                                                      | colorimetric methods (Boehring Mannheim, Germany)                                                                                                                                                            | selective detergent methodology, equipment from Abbott, Clinical Chemistry, USA                                                   |
| Total cholesterol        |  | -                                                                                                                                                                                                                                                                                                                                                                                                                                                                                                                                    | Analyzed in fresh non-fasting serum samples using enzymatic colorimetric methods (Boehring Mannheim, Germany)                                                                                                | Analyzed in fresh non-fasting serum samples by a cholesterol esterase methodology, equipment from Abbott, Clinical Chemistry, USA |
| Non-HDL cholesterol      |  | -                                                                                                                                                                                                                                                                                                                                                                                                                                                                                                                                    | Calculated as the difference between total and HDL cholesterol                                                                                                                                               | Calculated as the difference between total and HDL cholesterol                                                                    |
| Glucose                  |  | <ul style="list-style-type: none"> <li>- Non-fasting capillary glucose was measured in participants above 40 years, using Reflocheck-Glucose, Boehring Mannheim, Germany</li> <li>- Fasting capillary glucose was measured in persons with non-fasting capillary glucose <math>\geq 8.0</math> mmol/L</li> <li>- 2-hour oral glucose tolerance test was given if fasting capillary glucose was <math>&lt; 7.0</math> mmol/L</li> </ul> Capillary levels were transformed to equate serum values (in mmol/L) by multiplying with 1.11 | Serum glucose measured in fresh non-fasting serum samples in all participants using an enzymatic hexokinase method                                                                                           | Serum glucose measured in fresh non-fasting serum samples in all participants using an enzymatic hexokinase method                |
| Diabetes mellitus        |  | Self-report, fasting serum glucose $\geq 7.0$ mmol/L or 2-hour post-load serum glucose $\geq 11.1$ mmol/L                                                                                                                                                                                                                                                                                                                                                                                                                            | Self-report or non-fasting serum glucose $\geq 11.1$ mmol/L                                                                                                                                                  | Self-report or non-fasting serum glucose $\geq 11.1$ mmol/L                                                                       |
| C-reactive protein (CRP) |  | -                                                                                                                                                                                                                                                                                                                                                                                                                                                                                                                                    | Measured after 2 years of serum storage at $-80^{\circ}\text{C}$ in a sub-sample from 4 out of 24 municipalities using a C-reactive protein ultra-sensitive assay (Tina-quant(R), Roche, Basel, Switzerland) | Measured in fresh serum samples in all participants using a latex immunoassay (Abbott, Clinical Chemistry, USA)                   |

**Table S2. Predicted mean levels of cardiovascular disease risk factors by age at follow-up in women according to weight for gestational age in first pregnancy.**

|                                       | Extremely small for gestational age <sup>a</sup><br>(n=782) |         | Appropriate for gestational age <sup>b</sup><br>(n=21,299) | Extremely large for gestational age <sup>c</sup><br>(n=379) |         |
|---------------------------------------|-------------------------------------------------------------|---------|------------------------------------------------------------|-------------------------------------------------------------|---------|
|                                       | Difference estimate (95% CI)                                | p-value | Predicted mean (95% CI)                                    | Difference estimate (95% CI)                                | p-value |
| <b>BMI (kg/m<sup>2</sup>)</b>         |                                                             |         |                                                            |                                                             |         |
| 20 years                              | -0.2 (-0.5, -0.1)                                           | 0.171   | 22.8 (22.7, 22.9)                                          | 1.2 (0.9, 1.6)                                              | <0.001  |
| 30 years                              | -0.6 (-0.9, -0.2)                                           | 0.02    | 24.0 (24.0, 24.1)                                          | 1.6 (1.0, 2.1)                                              | <0.001  |
| 40 years                              | -0.4 (-0.8, -0.1)                                           | 0.001   | 25.0 (24.9, 25.1)                                          | 1.5 (1.0, 2.1)                                              | <0.001  |
| 50 years                              | -0.7 (-1.1, -0.3)                                           | 0.002   | 26.1 (26.0, 26.2)                                          | 1.6 (1.0, 2.3)                                              | <0.001  |
| 60 years                              | -0.6 (-1.2, -0.04)                                          | 0.04    | 26.8 (26.6, 27.0)                                          | 1.6 (0.7, 2.5)                                              | 0.001   |
| <b>Waist circumference (cm)</b>       |                                                             |         |                                                            |                                                             |         |
| 20 years                              | 2.0 (-1.3, 5.2)                                             | 0.23    | 77.1 (76.4, 77.8)                                          | 2.7 (-0.7, 6.1)                                             | 0.12    |
| 30 years                              | -1.7 (-3.4, -0.1)                                           | 0.04    | 81.9 (81.5, 82.2)                                          | 4.9 (2.7, 7.1)                                              | <0.001  |
| 40 years                              | -0.9 (-2.1, 0.4)                                            | 0.18    | 83.6 (83.4, 83.8)                                          | 3.6 (1.8, 5.3)                                              | <0.001  |
| 50 years                              | -1.5 (-2.8, -0.3)                                           | 0.02    | 85.7 (85.4, 86.0)                                          | 2.9 (0.9, 4.9)                                              | 0.004   |
| 60 years                              | -0.5 (-2.1, 1.2)                                            | 0.60    | 87.0 (86.6, 87.5)                                          | 4.0 (1.3, 6.7)                                              | 0.004   |
| <b>Hip circumference (cm)</b>         |                                                             |         |                                                            |                                                             |         |
| 20 years                              | 1.1 (-1.9, 4.0)                                             | 0.48    | 97.9 (97.3, 98.6)                                          | -0.1 (-3.2, 2.9)                                            | 0.93    |
| 30 years                              | -2.2 (-3.6, -0.8)                                           | 0.003   | 101.0 (100.7, 101.3)                                       | 3.8 (2.0, 5.7)                                              | <0.001  |
| 40 years                              | -1.0 (-2.0, 0.03)                                           | 0.06    | 102.0 (101.8, 102.2)                                       | 2.7 (1.3, 4.1)                                              | <0.001  |
| 50 years                              | -1.4 (-2.4, -0.5)                                           | 0.004   | 103.1 (102.9, 103.3)                                       | 2.3 (0.8, 3.9)                                              | 0.003   |
| 60 years                              | -0.6 (-1.9, 0.6)                                            | 0.33    | 103.1 (102.8, 103.4)                                       | 1.6 (-0.5, 3.6)                                             | 0.13    |
| <b>Waist to hip ratio</b>             |                                                             |         |                                                            |                                                             |         |
| 20 years                              | 0.0 (-0.01, 0.03)                                           | 0.34    | 0.8 (0.8, 0.8)                                             | 0.03 (0.01-0.05)                                            | 0.002   |
| 30 years                              | 0.0 (-0.01, 0.01)                                           | 0.67    | 0.8 (0.8, 0.8)                                             | 0.02 (0.00-0.03)                                            | 0.01    |
| 40 years                              | 0.0 (-0.01, 0.01)                                           | 0.69    | 0.8 (0.8, 0.8)                                             | 0.01 (0.00-0.02)                                            | 0.03    |
| 50 years                              | 0.0 (-0.01, 0.00)                                           | 0.37    | 0.8 (0.8, 0.8)                                             | 0.01 (0.00-0.02)                                            | 0.21    |
| 60 years                              | 0.0 (-0.01, 0.01)                                           | 0.47    | 0.9 (0.8, 0.9)                                             | 0.02 (0.01-0.04)                                            | 0.01    |
| <b>Systolic blood pressure (mmHg)</b> |                                                             |         |                                                            |                                                             |         |
| 20 years                              | 1.4 (-1.6, 4.5)                                             | 0.35    | 121.0 (117.9, 124.0)                                       | 2.8 (-0.7, 6.4)                                             | 0.12    |
| 30 years                              | 1.8 (0.2, 3.3)                                              | 0.03    | 119.1 (117.5, 120.7)                                       | 0.2 (-2.0, 2.4)                                             | 0.88    |
| 40 years                              | 1.6 (0.1, 3.1)                                              | 0.04    | 123.2 (121.7, 124.7)                                       | -0.4 (-2.6, 1.9)                                            | 0.74    |
| 50 years                              | 2.4 (0.5, 4.2)                                              | 0.01    | 132.2 (130.4, 134.0)                                       | 1.1 (-1.9, 4.1)                                             | 0.48    |

|                                 |                    |       |                      |                   |       |
|---------------------------------|--------------------|-------|----------------------|-------------------|-------|
| 60 years                        | 4.0 (1.3, 6.8)     | 0.004 | 142.2 (139.5, 145.0) | -2.2 (-6.6, 2.4)  | 0.35  |
| Diastolic blood pressure (mmHg) |                    |       |                      |                   |       |
| 20 years                        | 2.5 (0.3, 4.8)     | 0.03  | 70.8 (68.5, 73.1)    | 2.0 (-0.8, 4.7)   | 0.16  |
| 30 years                        | 0.2 (-0.9, 1.3)    | 0.73  | 70.6 (69.4, 71.7)    | 0.5 (-1.1, 2.1)   | 0.54  |
| 40 years                        | 1.8 (0.8, 2.8)     | 0.001 | 76.4 (75.4, 77.4)    | -1.1 (-2.6, 0.5)  | 0.17  |
| 50 years                        | 1.6 (0.4, 2.7)     | 0.01  | 80.4 (79.3, 81.6)    | 1.3 (-0.7, 3.2)   | 0.20  |
| 60 years                        | 0.5 (-1.3, 2.2)    | 0.60  | 80.6 (78.8, 82.3)    | 0.2 (-2.7, 3.0)   | 0.92  |
| Non-HDL cholesterol (mmol/l)    |                    |       |                      |                   |       |
| 20 years                        | 0.3 (-0.03, 0.6)   | 0.07  | 3.2 (3.1, 3.3)       | 0.2 (-0.1, 0.6)   | 0.16  |
| 30 years                        | 0.1 (-0.1, 0.3)    | 0.17  | 3.4 (3.4, 3.4)       | 0.2 (-0.02, 0.4)  | 0.07  |
| 40 years                        | 0.1 (-0.1, 0.2)    | 0.44  | 3.7 (3.7, 3.8)       | 0.2 (-0.01, 0.3)  | 0.06  |
| 50 years                        | 0.02 (-0.1, 0.1)   | 0.80  | 4.3 (4.3, 4.3)       | 0.2 (0.04, 0.4)   | 0.02  |
| 60 years                        | -0.1 (-0.3, 0.1)   | 0.29  | 4.8 (4.7, 4.8)       | -0.03 (-0.3, 0.2) | 0.82  |
| HDL cholesterol (mmol/l)        |                    |       |                      |                   |       |
| 20 years                        | -0.04 (-0.2, 0.1)  | 0.49  | 1.4 (1.4, 1.5)       | -0.1 (-0.2, 0.02) | 0.12  |
| 30 years                        | -0.02 (-0.1, 0.03) | 0.43  | 1.4 (1.4, 1.4)       | -0.1 (-0.1, 0.02) | 0.13  |
| 40 years                        | 0.02 (-0.02, 0.1)  | 0.36  | 1.4 (1.4, 1.4)       | -0.1 (-0.1, 0.02) | 0.01  |
| 50 years                        | 0.02 (-0.02, 0.06) | 0.42  | 1.5 (1.5, 1.5)       | -0.1 (-0.1, 0.02) | 0.14  |
| 60 years                        | 0.04 (-0.01, 0.09) | 0.13  | 1.5 (1.5, 1.6)       | -0.1 (-0.1, 0.03) | 0.21  |
| Triglycerides (mmol/L)          |                    |       |                      |                   |       |
| 20 years                        | 0.1 (-0.1, 0.3)    | 0.39  | 1.2 (1.2, 1.3)       | 0.02 (-0.2, 0.3)  | 0.85  |
| 30 years                        | -0.1 (-0.2, 0.1)   | 0.43  | 1.2 (1.1, 1.2)       | 0.1 (-0.04, 0.3)  | 0.13  |
| 40 years                        | -0.02 (-0.1, 0.1)  | 0.77  | 1.2 (1.2, 1.3)       | 0.2 (0.02, 0.3)   | 0.02  |
| 50 years                        | 0.02 (-0.1, 0.1)   | 0.65  | 1.5 (1.4, 1.5)       | 0.1 (-0.04, 0.3)  | 0.12  |
| 60 years                        | -0.03 (-0.2, 0.1)  | 0.72  | 1.7 (1.6, 1.7)       | 0.01 (-0.3, 0.3)  | 0.96  |
| Non-fasting glucose (mmol/l)    |                    |       |                      |                   |       |
| 20 years                        | -0.04 (-0.4, 0.3)  | 0.82  | 4.9 (4.8, 5.0)       | -0.2 (-0.6, 0.2)  | 0.27  |
| 30 years                        | -0.1 (-0.3, 0.1)   | 0.35  | 4.9 (4.9, 4.9)       | 0.4 (0.2, 0.6)    | 0.001 |
| 40 years                        | 0.02 (-0.1, 0.2)   | 0.77  | 5.1 (5.1, 5.2)       | 0.02 (-0.2, 0.2)  | 0.82  |
| 50 years                        | 0.01 (-0.1, 0.2)   | 0.94  | 5.3 (5.3, 5.4)       | 0.3 (0.1, 0.6)    | 0.01  |
| 60 years                        | -0.1 (-0.4, 0.1)   | 0.29  | 5.6 (5.5, 5.6)       | 0.6 (0.2, 1.0)    | 0.002 |
| Resting heart rate (beats/min)  |                    |       |                      |                   |       |
| 20 years                        | -1.5 (-4.4, 1.5)   | 0.33  | 75.5 (74.8, 76.2)    | 3.0 (-0.4, 6.5)   | 0.09  |
| 30 years                        | 1.6 (0.2, 3.1)     | 0.03  | 74.0 (73.7, 74.3)    | -0.5 (-2.5, 1.5)  | 0.60  |
| 40 years                        | 0.2 (-1.0, 1.4)    | 0.79  | 73.7 (73.4, 73.9)    | 0.9 (-0.9, 2.7)   | 0.34  |
| 50 years                        | -0.5 (-1.9, 0.8)   | 0.44  | 73.1 (72.8, 73.4)    | -1.4 (-3.6, 0.9)  | 0.22  |

|                         |          |                 |      |                   |                 |      |
|-------------------------|----------|-----------------|------|-------------------|-----------------|------|
| CRP <sup>d</sup> (mg/l) | 60 years | 0.6 (-1.4, 2.6) | 0.56 | 73.0 (72.4, 73.5) | 0.8 (-2.5, 4.1) | 0.64 |
|                         | 20 years | 1.0 (0.5, 2.5)  | 0.75 | 1.7 (1.4, 1.9)    | 2.0 (0.8, 4.7)  | 0.12 |
|                         | 30 years | 1.2 (0.8, 2.0)  | 0.39 | 1.0 (0.9, 1.1)    | 1.4 (0.9, 2.2)  | 0.10 |
|                         | 40 years | 0.9 (0.7, 1.2)  | 0.64 | 0.8 (0.8, 0.9)    | 1.2 (0.9, 1.6)  | 0.20 |
|                         | 50 years | 0.9 (0.8, 1.1)  | 0.37 | 1.0 (0.9, 1.0)    | 1.1 (0.8, 1.5)  | 0.57 |
|                         | 60 years | 1.1 (0.9, 1.3)  | 0.37 | 1.3 (1.2, 1.4)    | 1.2 (0.9, 1.6)  | 0.19 |

CI=confidence interval; BMI=body mass index; HDL=high density lipoprotein; CPR=C-reactive protein

<sup>a</sup> Extremely small for gestational age (SGA) was defined as birthweight below the 3<sup>rd</sup> centile for the Norwegian population

<sup>b</sup> Appropriate for gestational age (AGA) was defined as birthweight  $\geq$  3<sup>rd</sup> and  $\leq$  97<sup>th</sup> centile for the Norwegian population

<sup>c</sup> Extremely large for gestational age (LGA) was defined as birthweight above the 97<sup>th</sup> centile for the Norwegian population

<sup>d</sup> CRP is given as geometric mean values where the difference equates to the ratio of geometric mean CRP between women with SGA or LGA offspring and women with AGA offspring.

**Table S3. Predicted mean levels of cardiovascular disease risk factors by age at follow-up in 20,757 women with uncomplicated<sup>a</sup> first pregnancies according to birthweight for gestational age.**

|                                       | Small for gestational age <sup>b</sup><br>(n=2,674) |         | Appropriate for<br>gestational age <sup>c</sup><br>(n=16,822) | Large for gestational age <sup>d</sup><br>(n=1,261) |         |
|---------------------------------------|-----------------------------------------------------|---------|---------------------------------------------------------------|-----------------------------------------------------|---------|
|                                       | Difference<br>estimate                              | p-value | Predicted mean                                                | Difference<br>estimate                              | p-value |
| <b>BMI (kg/m<sup>2</sup>)</b>         |                                                     |         |                                                               |                                                     |         |
| 20 years                              | -0.4 (-0.5, -0.2)                                   | <0.001  | 22.7 (22.6, 22.8)                                             | 1.0 (0.9, 1.2)                                      | <0.001  |
| 30 years                              | -0.6 (-0.8, -0.4)                                   | <0.001  | 23.9 (23.8, 24.0)                                             | 1.2 (1.0, 1.5)                                      | <0.001  |
| 40 years                              | -0.8 (-1.0, -0.6)                                   | <0.001  | 24.9 (24.8, 25.0)                                             | 1.3 (1.0, 1.6)                                      | <0.001  |
| 50 years                              | -0.8 (-1.1, -0.6)                                   | <0.001  | 25.9 (25.8, 26.1)                                             | 1.3 (1.0, 1.7)                                      | <0.001  |
| 60 years                              | -0.9 (-1.2, -0.5)                                   | <0.001  | 26.7 (26.5, 26.8)                                             | 1.4 (0.9, 1.9)                                      | <0.001  |
| <b>Waist circumference (cm)</b>       |                                                     |         |                                                               |                                                     |         |
| 20 years                              | -1.1 (-2.7, 0.5)                                    | 0.18    | 76.8 (76.1, 77.6)                                             | 2.6 (0.8, 4.3)                                      | 0.004   |
| 30 years                              | -0.7 (-1.6, 0.2)                                    | 0.15    | 81.3 (80.9, 81.7)                                             | 3.5 (2.3, 4.7)                                      | <0.001  |
| 40 years                              | -1.8 (-2.5, -1.1)                                   | <0.001  | 83.3 (83.0, 83.6)                                             | 2.9 (2.0, 3.9)                                      | <0.001  |
| 50 years                              | -1.9 (-2.6, -1.2)                                   | <0.001  | 85.5 (85.2, 85.8)                                             | 2.1 (1.1, 3.2)                                      | <0.001  |
| 60 years                              | -1.8 (-2.7, -0.8)                                   | <0.001  | 86.9 (86.5, 87.4)                                             | 3.5 (2.0, 5.1)                                      | <0.001  |
| <b>Hip circumference (cm)</b>         |                                                     |         |                                                               |                                                     |         |
| 20 years                              | -1.8 (-3.3, -0.3)                                   | 0.02    | 97.9 (97.2, 98.5)                                             | 2.1 (0.5, 3.7)                                      | 0.01    |
| 30 years                              | -1.0 (-1.8, -0.2)                                   | 0.01    | 100.5 (100.2, 100.8)                                          | 2.8 (1.7, 3.8)                                      | <0.001  |
| 40 years                              | -1.8 (-2.3, -1.2)                                   | <0.001  | 101.9 (101.7, 102.1)                                          | 2.3 (1.5, 3.1)                                      | <0.001  |
| 50 years                              | -1.3 (-1.9, -0.8)                                   | <0.001  | 103.0 (102.7, 103.2)                                          | 1.5 (0.7, 2.3)                                      | <0.001  |
| 60 years                              | -1.5 (-2.2, -0.8)                                   | 0.001   | 103.1 (102.7, 103.4)                                          | 1.2 (0.1, 2.4)                                      | 0.03    |
| <b>Waist to hip ratio</b>             |                                                     |         |                                                               |                                                     |         |
| 20 years                              | 0.0 (-0.01, 0.01)                                   | 0.41    | 0.8 (0.8, 0.8)                                                | 0.01 (0.00-0.02)                                    | 0.03    |
| 30 years                              | 0.0 (-0.01, 0.01)                                   | 0.90    | 0.8 (0.8, 0.8)                                                | 0.01 (0.01-0.02)                                    | 0.001   |
| 40 years                              | 0.0 (-0.01, 0.00)                                   | 0.04    | 0.8 (0.8, 0.8)                                                | 0.01 (0.00-0.02)                                    | 0.001   |
| 50 years                              | -0.01 (-0.01, 0.00)                                 | 0.001   | 0.8 (0.8, 0.8)                                                | 0.01 (0.00-0.01)                                    | 0.02    |
| 60 years                              | 0.0 (-0.01, 0.01)                                   | 0.50    | 0.8 (0.8, 0.8)                                                | 0.02 (0.01-0.03)                                    | <0.001  |
| <b>Systolic blood pressure (mmHg)</b> |                                                     |         |                                                               |                                                     |         |
| 20 years                              | 0.7 (-1.0, 2.3)                                     | 0.42    | 119.0 (118.2, 119.8)                                          | 0.7 (-1.3, 2.6)                                     | 0.49    |
| 30 years                              | 0.8 (-0.1, 1.7)                                     | 0.08    | 116.8 (116.4, 117.2)                                          | 0.1 (-1.1, 1.3)                                     | 0.89    |
| 40 years                              | 1.0 (0.2, 1.8)                                      | 0.02    | 121.0 (120.6, 121.3)                                          | -0.2 (-1.4, 1.1)                                    | 0.80    |



|                                 |                    |       |                      |                    |      |
|---------------------------------|--------------------|-------|----------------------|--------------------|------|
| 50 years                        | 1.6 (0.6, 2.7)     | 0.003 | 129.0 (128.5, 129.4) | 1.3 (-0.3, 3.0)    | 0.11 |
| 60 years                        | 1.5 (-0.2, 3.1)    | 0.08  | 137.5 (136.7, 138.3) | -0.4 (-3.0, 2.1)   | 0.75 |
| Diastolic blood pressure (mmHg) |                    |       |                      |                    |      |
| 20 years                        | 0.7 (-0.6, 1.9)    | 0.30  | 68.0 (67.4, 68.6)    | -0.01 (-1.5, 1.5)  | 0.99 |
| 30 years                        | -0.3 (-0.9, 0.4)   | 0.41  | 70.0 (69.7, 70.2)    | 0.7 (-0.2, 1.6)    | 0.13 |
| 40 years                        | 0.7 (0.1, 1.3)     | 0.01  | 74.2 (74.0, 74.4)    | -0.02 (-0.9, 0.8)  | 0.96 |
| 50 years                        | 0.7 (0.02, 1.4)    | 0.06  | 78.5 (78.2, 78.8)    | 0.9 (-0.1, 2.0)    | 0.09 |
| 60 years                        | -0.2 (-1.2, 0.8)   | 0.69  | 80.0 (79.5, 80.5)    | -0.2 (-1.8, 1.4)   | 0.82 |
| Non-HDL cholesterol (mmol/l)    |                    |       |                      |                    |      |
| 20 years                        | 0.1 (-0.1, 0.2)    | 0.44  | 3.2 (3.1, 3.2)       | 0.04 (-0.1, 0.2)   | 0.66 |
| 30 years                        | 0.03 (-0.1, 0.1)   | 0.53  | 3.4 (3.3, 3.4)       | 0.1 (0.01, 0.3)    | 0.05 |
| 40 years                        | -0.01 (-0.1, 0.1)  | 0.68  | 3.7 (3.7, 3.7)       | 0.1 (0.01, 0.2)    | 0.02 |
| 50 years                        | -0.04 (-0.1, 0.03) | 0.26  | 4.3 (4.3, 4.3)       | 0.1 (0.03, 0.3)    | 0.01 |
| 60 years                        | -0.03 (-0.1, 0.1)  | 0.61  | 4.8 (4.7, 4.8)       | 0.2 (-0.01, 0.3)   | 0.05 |
| HDL cholesterol (mmol/l)        |                    |       |                      |                    |      |
| 20 years                        | -0.02 (-0.1, 0.04) | 0.58  | 1.4 (1.4, 1.5)       | -0.1 (-0.1, 0.0)   | 0.07 |
| 30 years                        | 0.01 (-0.02, 0.1)  | 0.35  | 1.4 (1.4, 1.4)       | -0.02 (-0.1, 0.02) | 0.30 |
| 40 years                        | 0.02 (-0.01, 0.04) | 0.08  | 1.4 (1.4, 1.4)       | -0.03 (-0.1, 0.00) | 0.09 |
| 50 years                        | 0.01 (-0.02, 0.03) | 0.69  | 1.5 (1.5, 1.5)       | -0.02 (-0.1, 0.02) | 0.36 |
| 60 years                        | 0.03 (-0.01, 0.1)  | 0.08  | 1.6 (1.5, 1.6)       | -0.05 (-0.1, 0.00) | 0.04 |
| Triglycerides (mmol/l)          |                    |       |                      |                    |      |
| 20 years                        | 0.04 (-0.1, 0.2)   | 0.52  | 1.2 (1.2, 1.3)       | 0.03 (-0.1, 0.2)   | 0.64 |
| 30 years                        | 0.01 (-0.1, 0.1)   | 0.73  | 1.1 (1.1, 1.2)       | 0.1 (-0.02, 0.2)   | 0.14 |
| 40 years                        | 0.01 (-0.04, 0.1)  | 0.63  | 1.2 (1.2, 1.3)       | 0.1 (0.01, 0.2)    | 0.03 |
| 50 years                        | 0.03 (-0.03, 0.1)  | 0.38  | 1.4 (1.4, 1.5)       | 0.1 (-0.03, 0.2)   | 0.15 |
| 60 years                        | -0.02 (-0.1, 0.1)  | 0.67  | 1.7 (1.6, 1.7)       | 0.1 (-0.02, 0.3)   | 0.10 |
| Non-fasting glucose (mmol/l)    |                    |       |                      |                    |      |
| 20 years                        | -0.00 (-0.2, 0.2)  | 0.98  | 4.8 (4.8, 4.9)       | 0.03 (-0.1, 0.2)   | 0.69 |
| 30 years                        | -0.06 (-0.2, 0.04) | 0.23  | 4.9 (4.8, 4.9)       | 0.2 (0.1, 0.3)     | 0.01 |
| 40 years                        | 0.00 (-0.1, 0.1)   | 0.95  | 5.1 (5.1, 5.1)       | 0.04 (-0.1, 0.1)   | 0.50 |
| 50 years                        | -0.1 (-0.1, 0.02)  | 0.16  | 5.3 (5.3, 5.4)       | 0.1 (0.04, 0.2)    | 0.19 |
| 60 years                        | -0.1 (-0.2, 0.1)   | 0.21  | 5.6 (5.5, 5.6)       | 0.2 (-0.03, 0.4)   | 0.09 |
| Resting heart rate (beats/min)  |                    |       |                      |                    |      |
| 20 years                        | -0.5 (-2.0, 1.1)   | 0.57  | 75.0 (74.3, 75.8)    | -0.2 (-2.1, 1.7)   | 0.83 |
| 30 years                        | 0.6 (-0.2, 1.4)    | 0.14  | 73.9 (73.5, 74.2)    | -0.9 (-2.0, 0.2)   | 0.11 |
| 40 years                        | -0.2 (-0.8, 0.5)   | 0.67  | 73.7 (73.4, 74.0)    | -0.9 (-1.9, 0.1)   | 0.08 |

|                         |                 |      |                   |                  |       |
|-------------------------|-----------------|------|-------------------|------------------|-------|
| 50 years                | 0.2 (-0.6, 1.1) | 0.55 | 72.9 (72.6, 73.3) | -0.4 (-1.6, 0.9) | 0.54  |
| 60 years                | 0.4 (-0.8, 1.6) | 0.54 | 73.1 (72.5, 73.6) | 0.1 (-1.8, 2.0)  | 0.91  |
| CRP <sup>c</sup> (mg/l) |                 |      |                   |                  |       |
| 20 years                | 0.9 (0.7, 1.3)  | 0.73 | 1.7 (1.4, 2.0)    | 0.8 (0.5, 1.3)   | 0.40  |
| 30 years                | 1.0 (0.8, 1.3)  | 0.88 | 1.0 (0.9, 1.1)    | 1.5 (1.1, 1.9)   | 0.003 |
| 40 years                | 0.9 (0.8, 1.1)  | 0.23 | 0.8 (0.8, 0.9)    | 1.0 (0.8, 1.2)   | 0.83  |
| 50 years                | 1.0 (0.9, 1.2)  | 0.63 | 1.0 (0.9, 1.0)    | 1.1 (0.9, 1.2)   | 0.69  |
| 60 years                | 1.1 (0.9, 1.2)  | 0.41 | 1.3 (1.2, 1.3)    | 1.2 (1.0, 1.5)   | 0.02  |

CI=confidence interval; BMI=body mass index; HDL=high density lipoprotein; CPR=C-reactive protein

<sup>a</sup> Defined as pregnancies not complicated by hypertensive disorders of pregnancy, pre-pregnancy, gestational diabetes mellitus, or stillbirth.

<sup>b</sup> Small for gestational age (SGA) was defined as birthweight below the 10<sup>th</sup> centile for the Norwegian population

<sup>c</sup> Appropriate for gestational age (AGA) was defined as birthweight  $\geq$  10<sup>th</sup> and  $\leq$  90<sup>th</sup> centile for the Norwegian population

<sup>d</sup> Large for gestational age (LGA) was defined as birthweight above the 90<sup>th</sup> centile for the Norwegian population

<sup>e</sup> CRP is given as geometric mean values where the difference equates to the ratio of geometric mean CRP between women with SGA or LGA offspring and women with AGA offspring.

**Figure S2. Predicted probabilities of hypertension, obesity and diabetes according to offspring birthweight for gestational age.**

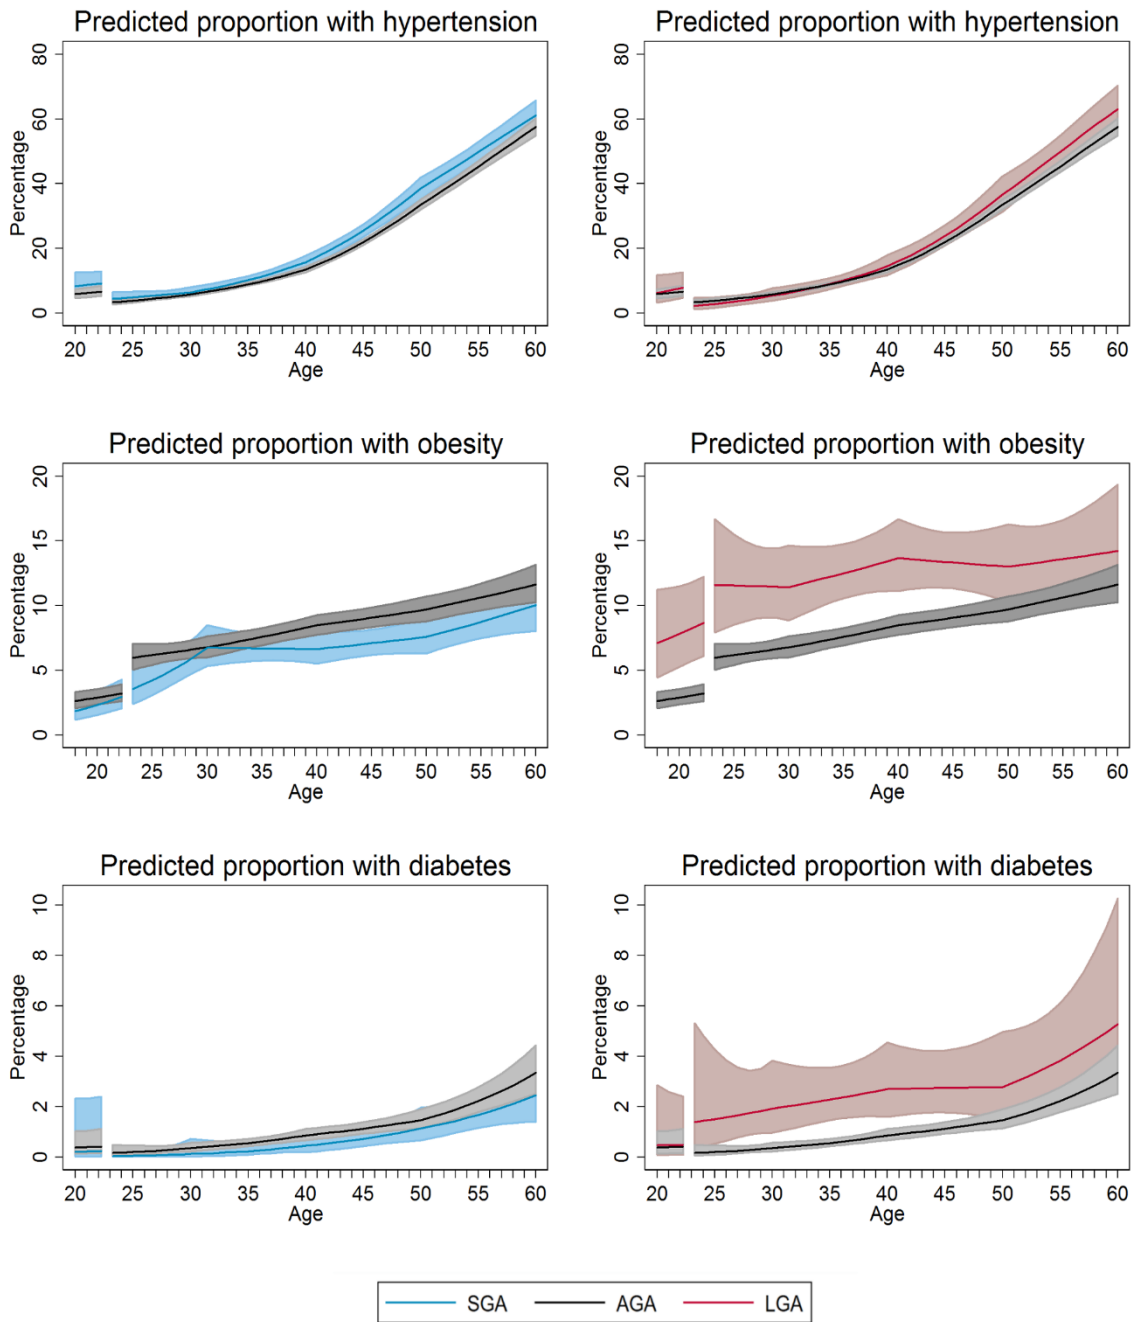

**Figure S3. Life course trajectories of mean systolic blood pressure, diastolic blood pressure, resting heart rate, and CRP for women according to weight for gestational age in first and second pregnancy.**

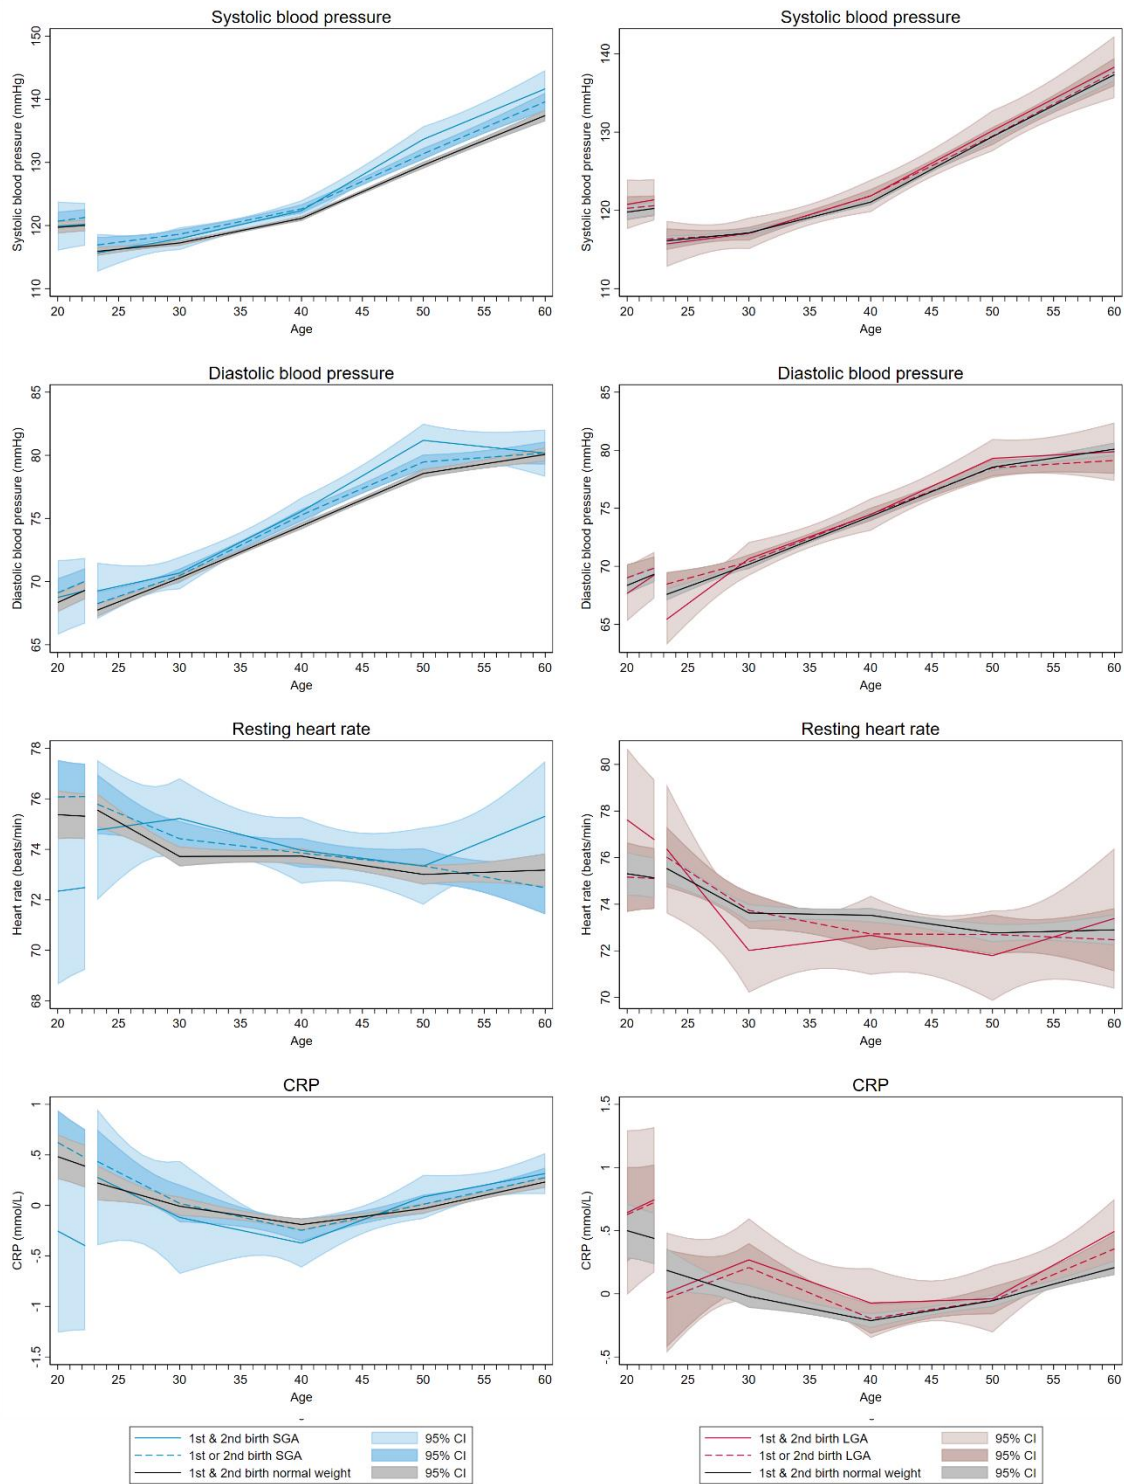

**Figure S4. Life course trajectories of mean BMI, waist circumference, hip circumference, and waist to hip ratio according to weight for gestational age in first and second pregnancy.**

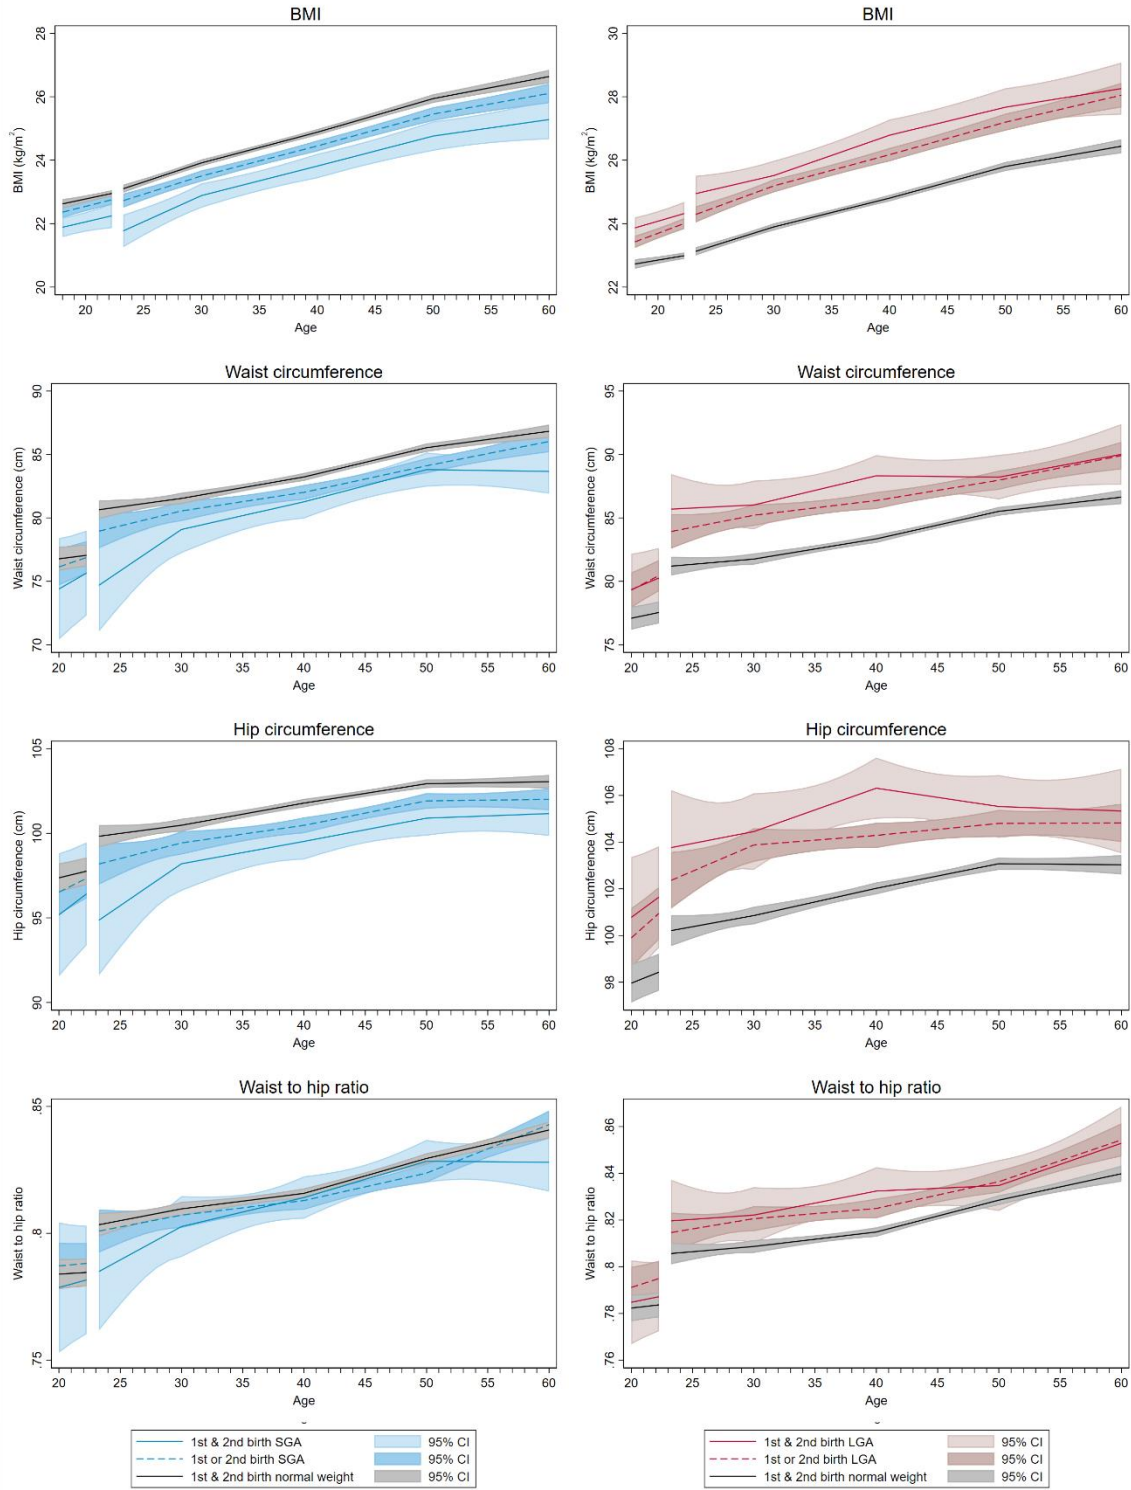

**Figure S5. Life course trajectories of mean nonfasting serum Non-HDL and HDL cholesterol, triglycerides, and glucose for women according to weight for gestational age in first and second pregnancy.**

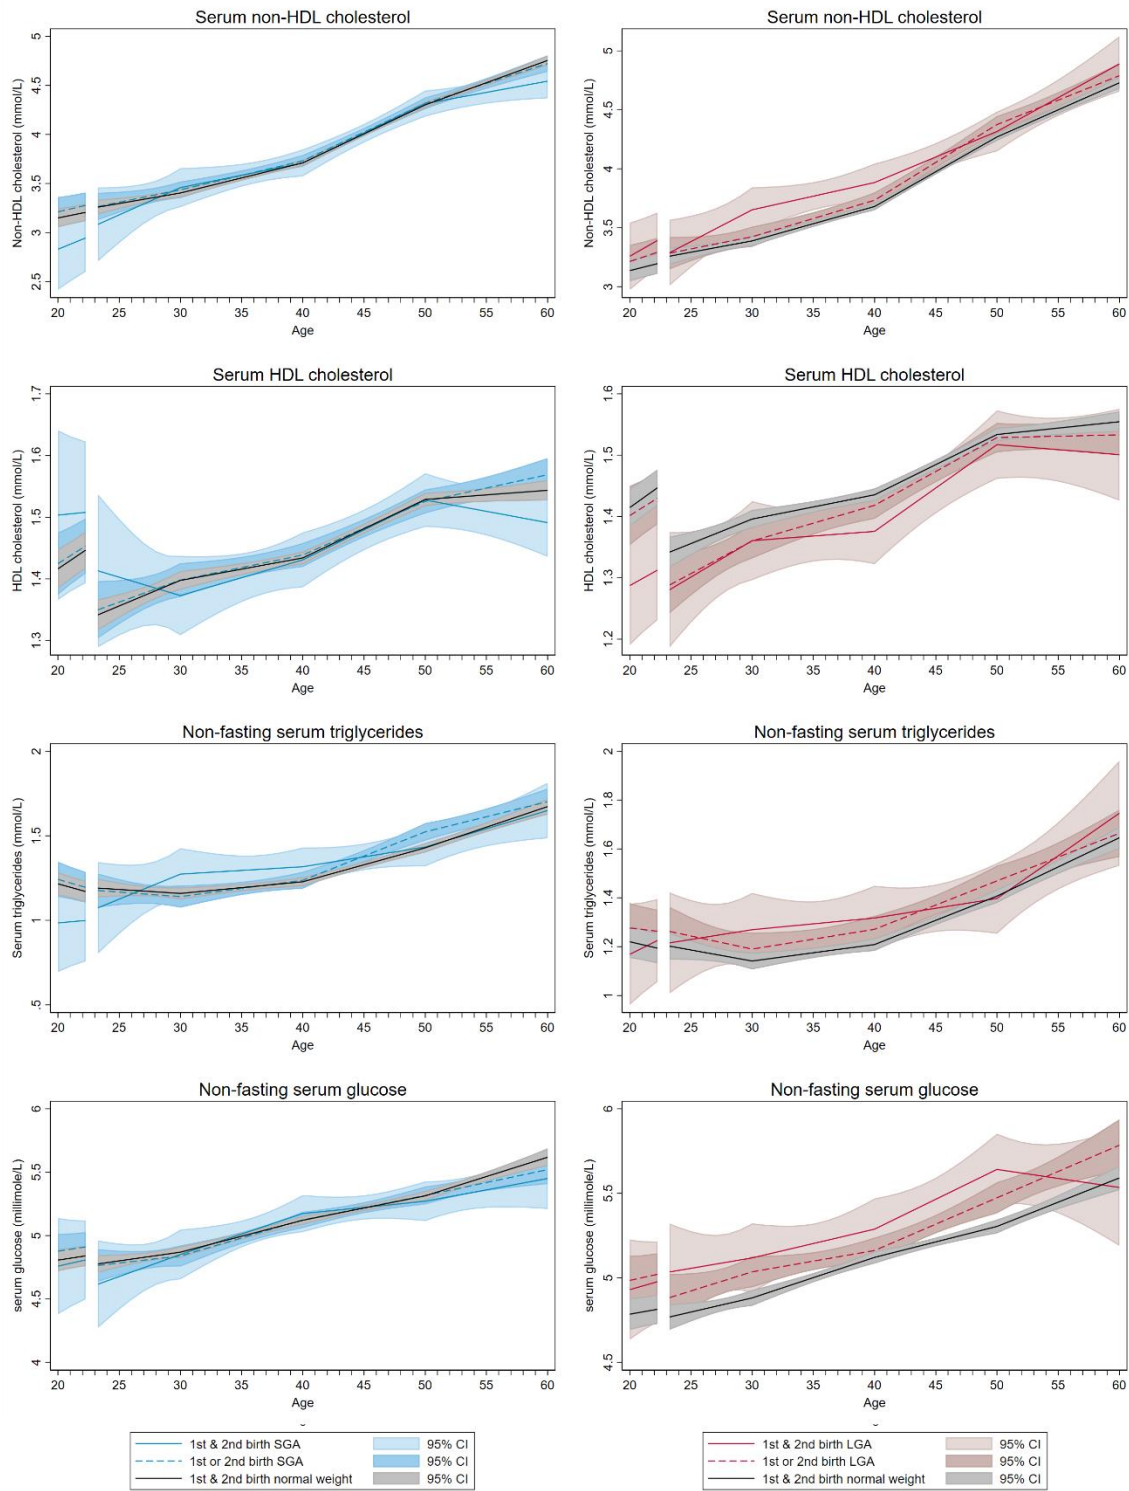

**Figure S6. Number of cardiovascular risk factor measurements according to time since first birth (years) and HUNT survey.**

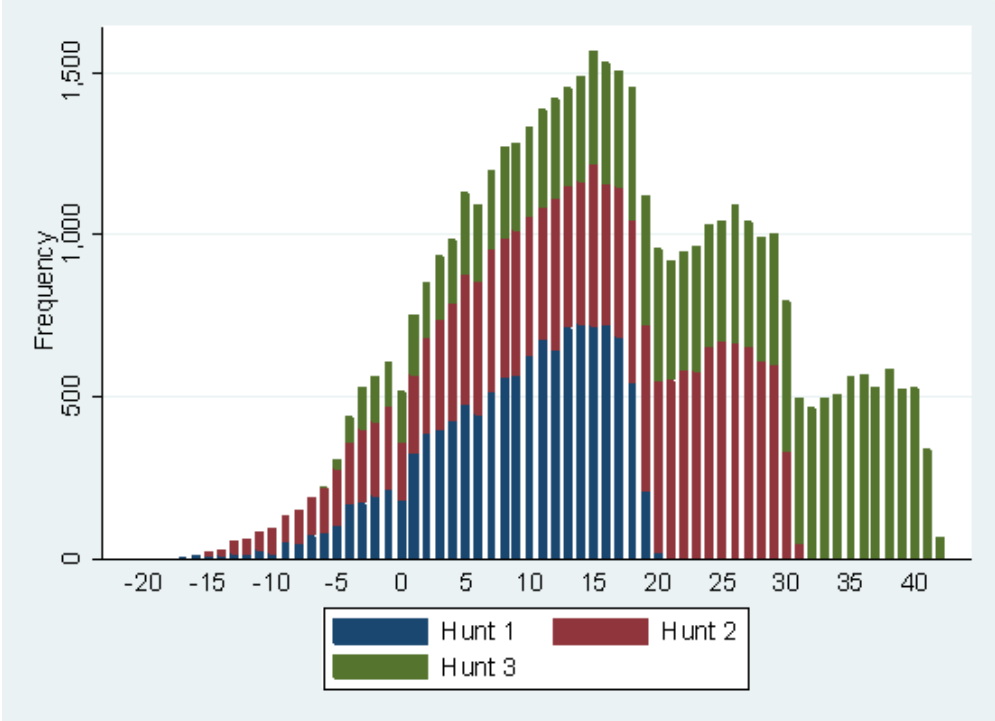

Supplement: 41598_2020_66365_MOESM1_ESM.pdf [file 41598_2020_66365_MOESM1_ESM.pdf]
